1        **New Insights into Molecular Basis Identification of Three Novel**  
2                    **Strains of the Bacillus Subtilis Group Produce Cry Proteins**  
3                    **Isolated from Soil Samples in Adana, Turkey**

4

5        Semih Yılmaz<sup>1,2</sup>, Abeer Babiker Idris<sup>3\*</sup>, Abdurrahman Ayvaz<sup>4</sup>, Aysun Çetin<sup>5</sup>,  
6        Funda Ülgen<sup>6</sup>, Mustafa Çetin<sup>2</sup>, Berkay Saraymen<sup>7</sup>, Mohamed A. Hassan<sup>2,8,9,10</sup>

7                    \* Corresponding author: [abeer.babiker89@gmail.com](mailto:abeer.babiker89@gmail.com)

8

9        <sup>1</sup> Department of Agricultural Biotechnology, Faculty of Agriculture, Erciyes University, Kayseri,  
10        Turkey

11        <sup>2</sup> Erciyes Teknopark, Promoseed biotechnology A.Ş., Kayseri, Turkey

12        <sup>3</sup> Department of Agricultural Science and Technology, Institute of Natural and Applied Sciences,  
13        Erciyes University, Kayseri, Turkey

14        <sup>4</sup> Department of Biology, Faculty of science, Erciyes University, Kayseri, Turkey

15        <sup>5</sup> Department of Medical Biochemistry, Faculty of Medicine, Erciyes University, Kayseri, Turkey

16        <sup>6</sup> Department of Biology, Institute of Natural and Applied Sciences, Erciyes University, Kayseri,  
17        Turkey

18        <sup>7</sup> ERNAM Nanotechnology Research and Application Center, Erciyes University, Kayseri, Turkey

19        <sup>8</sup> Department of Bioinformatics, Africa City of Technology, Khartoum, Sudan

20        <sup>9</sup> Department of Bioinformatics, DETAGEN Genetic Diagnostics Center, Kayseri, Turkey

21        <sup>10</sup> Department of Translation Bioinformatics, Detavax Biotech, Kayseri, Turkey

22

23

24        SY: [ylmazsemh@yahoo.com](mailto:ylmazsemh@yahoo.com); ABI: [abeer.babiker89@gmail.com](mailto:abeer.babiker89@gmail.com); AA: [ayvaza@erciyes.edu.tr](mailto:ayvaza@erciyes.edu.tr); AÇ:

25        [aysuncetin@yahoo.com](mailto:aysuncetin@yahoo.com); FÜ: [fundaulgen@gmail.com](mailto:fundaulgen@gmail.com); MÇ: [mcetin2000@yahoo.com](mailto:mcetin2000@yahoo.com); BS:

26        [berkaysaraymen@gmail.com](mailto:berkaysaraymen@gmail.com); MAH: [altwoh20002002@yahoo.com](mailto:altwoh20002002@yahoo.com)

27

28

29

30

## 31 **Abstract**

### 32 **Aims**

33 This study aimed to analyze the evolutionary relationship between *Bacillus* species  
34 isolated from agricultural soil using in-silico tools.

### 35 **Methods and Results**

36 Across-sectional study was conducted in Adana province, in Turkey. A total of 120  
37 *Bacillus* species were isolated from 80 soil samples. However, the phylogenetic tree  
38 diverged into two lineages; one belongs to *B. subtilis* group while the other belongs to *B.*  
39 *cereus* group. Interestingly, three native strains (*SY27.1A*, *SY35.3A*, and *SY58.5A*), which  
40 produce Cry proteins, shared high similarity with *B. subtilis* group (over 99%) and less  
41 than 95% similarity with known *B. thuringiensis* and other species of *B. cereus* group.  
42 Furthermore, 11 canonical SNPs (canSNPs) were identified in strains that belong to *B.*  
43 *pumilus* group when compared with *B. subtilis* reference sequences.

### 44 **Conclusions**

45 Phylogenetic analysis of *16S rRNA* sequences was found valuable for differentiation  
46 between *Bacillus* species isolated from soil samples. In addition, SNPs analysis provided  
47 more intra-specific information in the cases of *B. subtilis* group.

### 48 **Significance and Impact of Study**

49 A detailed analysis was provided for the SNPs present in a conserved region of *16S*  
50 *rRNA* gene of *Bacillus* species. Also, we proposed three novel *Bacillus* strains that  
51 produce Cry proteins and belong to *B. subtilis* group.

52

53 **Keywords:** *Bacillus* species, *16S rRNA* gene, evolutionary tree, canonical SNPs, Turkey.

54

55

## 56 **1. Introduction**

57 *Bacillus* is agriculturally important insecticidal bacterial genus that naturally  
58 inhabit the phyllosphere and rhizosphere (1). It consists of a heterogeneous  
59 group of Gram-positive, endospore-forming, aerobic or facultative anaerobic  
60 organisms (2). Most members of the genus *Bacillus* have the ability to produce  
61 antibiotics, enzymes, vitamins, proteins, or secondary metabolites that are  
62 capable to induce defense mechanisms and promote growth in animals and  
63 plants (3, 4). Benefiting from their metabolic diversity and spore dispersal,  
64 *Bacillus* is ubiquitous in various natural environments especially terrestrial  
65 environments (5). At the time of writing, the genus *Bacillus* consisted of more  
66 than 408 species with validly published names (LPSN,  
67 <http://www.bacterio.net>), only 54 species of them were reported before 2000 (6).

68 Analysis of *16S rRNA* gene, the “ultimate molecular chronometer”, has been  
69 extensively applied for bacterial phylogeny and taxonomy which resulted  
70 eventually in the establishment of large public-domain databases (7-11). The *16S*  
71 *rRNA* gene characterizes by several properties which include being present in all  
72 bacteria, thus it is a universal target for bacterial identification and  
73 characterization (12, 13). In addition, the function of *16S rRNA* has not changed  
74 over a long period, i.e. random sequence changes are more likely to reflect the  
75 microbial evolutionary change (phylogeny) (11), and any introduction of selected

76 changes in one domain does not greatly affect sequences in other domains (13,  
77 14). Based on phylogenetic analysis of the *16S rRNA* gene, the species and strains  
78 in *Bacillus* are divided into five groups: *B. cereus*, *B. megaterium*, *B. subtilis*, *B.*  
79 *circulans* and *B. brevis* groups (15).

80 The *B. subtilis* group is a tight assemblage of closely related species which  
81 includes *B. subtilis*, *B. amyloliquefaciens*, *B. atrophaeus*, *B. axarquiensis*, *B.*  
82 *malacitensis*, *B. mojavensis*, *B. sonorensis*, *B. tequilensis*, *B. vallismortis* and *B.*  
83 *velezensis* (16). These species share high genetic homogeneity (over 99.5%) and  
84 cannot differentiate on the basis of phenotypic or biochemical characteristics (15,  
85 16). In addition, *B. pumilus* and their relatives belong to the *subtilis* group (17).

86 The *B. pumilus* group, which is a large group of *Bacillus*, composed of *B. pumilus*,  
87 *B. altitudinis*, *B. safensis*, *B. zhangzhouensis*, *B. xiamenensis*, and *B. australimaris* (5).

88 The bacteria of *B. cereus* group share high genetic homogeneity despite their  
89 phenotypic diversity, with over 97% *16S rRNA* sequence similarity among *B.*  
90 *cereus*, *B. anthracis*, *B. thuringiensis*, *B. weihenstephanensis*, *B. mycooides*, *B.*  
91 *pseudomycooides*, *B. cytotoxicus*, *B. gaemokensis* and *B. manliponensis* (18). Moreover,  
92 this group is of interest to researchers, especially *B. thuringiensis*, because of their  
93 significance in agriculture, industry and medicine (19). *B. thuringiensis* acts as a  
94 biological control agent against different phytopathogenic organisms due to their  
95 ability to produce insecticidal proteins (Cry, Vip, Sip, Bin, etc), fungicidal  
96 metabolites (iturin, fengycin, surfactin, zwittermycin, etc) (20, 21). Also, *B.*

97 *thuringiensis* can promote plant growth by producing ACC deaminase,  
98 phosphatases, siderophore, etc (22, 23). However, the isolation and  
99 characterization of native *Bacillus* species or strains, especially from agricultural  
100 soil, should receive a good attention because of their wide potential biological  
101 products with immense applications. In addition, there are several studies on the  
102 isolation and characterization of native *Bacillus* strains of soil in order to identify  
103 novel toxins with high level of toxicity and effective against agricultural pests  
104 (24-26). Finding of novel toxins produce from *Bacillus* species, especially *B.*  
105 *thuringiensis*, will delay the resistance within the pests due to the use of existing  
106 *Bacillus* toxins. Therefore, in this study, we aimed to characterize and establish a  
107 phylogenetic relationship between *Bacillus* species isolated from agricultural soil  
108 in Adana, one of the most fertile agricultural area in Turkey, by reconstructing  
109 *16S rRNA* phylogenetic trees using in silico tools. Also, a detailed analysis was  
110 provided, for the SNPs present in a conserved region of *16S rRNA* gene of *B.*  
111 *cereus* group, *B. Subtilis* group and *B. pumilus* group. The results of canonical  
112 SNPs (canSNPs) are of great significance for the design of primers or probes  
113 specific to a strain, species, or group of species.

114

115

116

## 117 **2. Materials and Methods**

### 118 **2.1 Study Settings and Sample collection**

119 A cross-sectional study was conducted in Adana province, which is located in  
120 the southern region of Turkey. Adana province is divided into 13 districts with  
121 different texture. For the isolation of bacterial strains, 80 different soil samples  
122 were collected throughout Adana province from different altitudes ranging from  
123 0 to 1582 meters. Soil samples have been taken in a depth of 2-10 centimeters and  
124 stored in sterile tubes at 4°C for the studies.

### 125 **2.2 Bacterial Isolation and Identification**

126 Isolation processes has been performed according to the method of Travers *et al.*  
127 (27). One gram of soil sample was inoculated in LB medium (pH 6.8±2) including  
128 0.25M sodium acetate in a shaking incubator at 200 rpm at 30°C for 4 hours. After  
129 the incubation step, 1.5 ml of liquid samples have been transferred to a sterile  
130 Eppendorf tube and exposed to 80°C for 10 minutes to kill the vegetative  
131 bacterial forms. A 20-50 ul of samples were spread on LB agar plates and  
132 incubated overnight at 30°C. The colonies with morphological differences have  
133 been spread on agar plates and pure colonies were obtained. Pure colonies were  
134 incubated in 5ml LB broth (pH 6.8±2) in 50 ml tubes at 200 rpm and 30°C  
135 overnight.

136 Then the colonies were homogenized in 400  $\mu$ l of sterile dH<sub>2</sub>O in microfuge tubes  
137 and 10  $\mu$ l were added onto sterilized Watman no:1 paper disc with 0.4 mm  
138 diameter. The discs were then placed into Potato Dextrose agar (PDA) plates and  
139 incubated overnight at 30°C. Morphologically pale-yellow, grayish white, pale-  
140 pink, ciliated, or wrinkled ends, round-shaped outlines were selected for Gram  
141 stain (28). Gram- positive colonies were further investigated for spore production  
142 using Malachite green (5g /100ml) staining as previously described (29).

### 143 **2.3 Characterization of para-sporal inclusions**

144 To characterize para-sporal inclusions, the bacteria were incubated in 150 ml of  
145 3T medium (2 g triptose, 3 g triptone, 1.5 g yeast extract, 6 g NaH<sub>2</sub>PO<sub>4</sub>, 0.005 g  
146 MnCl<sub>2</sub> and 7.1 g Na<sub>2</sub>HPO<sub>4</sub>) at 200 rpm and 30 °C for 7 days to induce sporulation  
147 (27). Then, to harvest spore-crystal mixtures, the suspensions were centrifuged at  
148 15000  $\times$ g and 4 °C for 10 min. After that, the mixtures were suspended in dH<sub>2</sub>O  
149 on microscope slides and fixed. Finally, the slides were sputter coated with 10  
150 nm Au/Pd using a SC7620 Mini-sputter coater and viewed using a LEO440  
151 scanning electron microscope (SEM) at 20kV beam current (30, 31) in this study  
152 reference standard *B. thuringiensis* strains such as *Bt. kurstaki HD1*, *Bt. kurstaki*  
153 *HD73*, *Bt. aizawai* (Universidad Nacional Autonoma de Mexico Biotechnology  
154 Institute), *Bt. morrisoni*, *Bt. israelensis* (Pasteur Institute, Paris, France) and, *Bt.*  
155 *tenebrionis* (Plant Genetic Systems, J. Plateaustroat 22, 900 Gent, Belgium) were  
156 used for comparison with the native local isolates.

## 157 **2.4 Genetics analysis**

### 158 **2.4.1 Determination of the insecticidal *cry* genes (*cry*) carrying isolates**

159 Extraction of DNA was performed according to a previously described method  
160 (32, 33). Briefly, the bacteria were grown in LB medium for overnight, and then a  
161 loopful of cells was placed into 400 µl sterile dH<sub>2</sub>O. Then the mixture was boiled  
162 for 10 min to lyse the cells. The resulting cell lysate was centrifuged for 10 sec at  
163 10.000 rpm and the supernatant was used as DNA templates for PCR reactions.  
164 The extracted DNA from the isolates was used to determine the *cry* genes  
165 carrying strains. In our previous work, we have characterized the isolates using  
166 *cry* genes *cry1Ab/ Ac*, *cry1Aa/Ad*, *cry2*, *cry5*, and *cry9C*, *cry1C*, *cry1Ad*, *cry1Ac*,  
167 *cry1D*, *cry1B*, *cry3-7-8*, *cry4A*, *cry9A*, and *cry11A/B* (30, 31).

### 168 **2.4. 2 Amplification and sequencing of 16S rRNA gene**

169 The extracted DNA was used to amplify the 16S rRNA gene of Bacillus species  
170 using universal primers with the following sequences: F: 5'-AAA CTY AAA KGA  
171 ATT GAC GG-3' and R: 5'-ACG GGC GGT GTG TRC-3'. The thermal procedures  
172 were performed with ABI veriti Thermocycler and the PCR mixtures contained  
173 2.3 mM MgCl<sub>2</sub>, 1x Taq buffer, 0.2 mM dNTP mix, 0.3 pmol for each primer, 0.5 U  
174 Taq DNA polymerase, and 30–100 ng template DNA. The PCR conditions were  
175 an initial denaturation 94°C 5 min, then 40 cycles of denaturation at 94°C for  
176 1min, primer annealing at 48°C for 1 min, extension at 72°C for 2min, and then



177 additional extension step 72°C for 10min. The size of expected PCR products was  
178 850 bp.

179 For sequencing, the DNA fragments were extracted from the gel using a  
180 EasyPure® Quick Gel Extraction Kit (EG101-01) according to the manufacturer's  
181 instruction. Then the PCR products of 21 samples, which have the clearest bands,  
182 were sent for commercial DNA purification and Sanger dideoxy sequencing by  
183 DETAGEN Genetic Diagnostics Center Inc., Turkey.

## 184 **2.5 Bioinformatics analysis**

### 185 **2.5.1 Sequence and SNP analysis**

186 The two chromatograms for each strain (forward and reverse) were visualized,  
187 checked the quality, and analyzed using the Finch TV program version 1.4.0 (34).  
188 The bacterial strains were identified by searching for their homology among  
189 published reference sequences using the nucleotide Basic Local Alignment  
190 Search Tool (BLASTn; <https://blast.ncbi.nlm.nih.gov/>) (35). To determine the  
191 SNPs, multiple sequences alignment (MSA) was accomplished with reference  
192 sequences of *Bacillus* species using BioEdit software (36) and MEGA version 7.0  
193 software (37). This MSA facilitated the use of polymorphisms to detect potential  
194 relationships between the *Bacillus* strains and species. In addition, the detected  
195 SNPs were carefully reviewed by eye using the Finch TV software; and  
196 polymorphisms present in both the forward and reverse strands were  
197 considered.

## 198 2.5. 2 Molecular phylogenetic analysis

199 For building the phylogenetic tree, the studied sequences and their highly similar  
200 references sequences that retrieved from the NCBI GenBank were subjected to  
201 Gblocks software to eliminate poorly aligned positions and divergent regions of  
202 aligned sequences, so the alignment becomes more suitable for phylogenetic  
203 analysis (38). The molecular evolutionary analyses were conducted with MEGA  
204 7.0 software (37) using the maximum likelihood (ML) method and neighbour-  
205 joining (NJ) method (39, 40). The Kimura 2-parameter (K2+G) model from the  
206 substitution (ML) model was used with 1000 bootstrap replicates to construct  
207 distance-based trees (41, 42).

208

209

210

## 211 3. Results

### 212 3.1 Bacterial isolation and characterization

213 A total of 120 *Bacillus* species were isolated from 80 soil samples. Eighty-eight of *Bacillus*  
214 isolates harbored *cry* genes. The *cry* genes were determined and characterized using  
215 conventional PCR. Also, spore-crystals of some of the samples were examined under the  
216 SEM. The results in details were presented in our previous works (30, 31). In the current  
217 study, *16S rRNA* of 21 *Bacillus* species were amplified and sequenced to construct a

218 phylogenetic tree. Among them, six strains were characterized by producing Cry  
219 proteins. The morphology of spore-crystals and *cry* genes profiles of the native *Bacillus*  
220 isolates are illustrated in Table 1. The nucleotide sequences of the *16S rRNA* were  
221 deposited in the GenBank database under the following accession numbers: from  
222 OK428682 to OK428687 and from OK384678 to OK384692.

223 Table 1. The morphology of spore-crystals and *cry* gene profiles of the native *Bacillus*  
224 isolates

| Isolates               | Cry forms      | <i>cry</i> genes                                     |
|------------------------|----------------|------------------------------------------------------|
| <b><i>SY49.1</i></b>   | bp             | <i>cry1Aa/Ad, cry1B, cry1C, cry5, cry9A, cry9C</i>   |
| <b><i>SY27.1A</i></b>  | bp, cs, ss, pe | <i>cry1Ad, cry1Ac, cry1Ab/Ac, cry1B, cry2, cry9C</i> |
| <b><i>SY35.3A</i></b>  | ss             | <i>cry3-7-8</i>                                      |
| <b><i>SY58.5A</i></b>  | bp, cs         | <i>cry1Ac, cry1Ab/Ac, cry2</i>                       |
| <b><i>SY10.1A</i></b>  | bp             | <i>cry1Ac</i>                                        |
| <b><i>SY25. 1A</i></b> | bp             | <i>cry1C, cry1Ab/Ac, cry1Aa/Ad</i>                   |

225 bp: bipyramidal; ss: smooth spherical; pe: spherical crystal with pointy edges; cs, cuboidal

### 226 **3.2 Sequencing analysis of *16S rRNA* gene**

227 Twenty-one isolates of *Bacillus* species were subjected to PCR amplification and  
228 nucleotide sequencing using universal *16S rRNA* primers but specific for a conserved  
229 region of the gene which was located between 629 bp and 1552 bp. The sequences of the  
230 studied strains were aligned with reference sequences of *Bacillus* species retrieved from  
231 NCBI databases. The information about the retrieved strains is given in supplementary  
232 Table S1.

233 As presented in Figure 1, 11 strains revealed high similarity with the *B. cereus* group  
234 (over 99%), see Figure 1. Among them, seven strains, which were found to be  
235 homogenous, revealed two nucleotide variations (A1015C and A1146T). Numbers are  
236 given in all sequences in accordance with numbering in the *B. thuringiensis* genome  
237 (NZ\_CM000747). Six of these strains (*SY49.1*, *SY10.1A*, and *SY25.1A*) were characterized  
238 by the production of Cry proteins. While six and four of the studied strains exhibited  
239 high similarities to *B. subtilis* group and *B. pumilus* group, respectively (Figure 3).  
240 Interestingly, three of native strains (*SY27.1A*, *SY35.3A*, *SY58.5A*), which produce Cry  
241 proteins, shared high similarity with *B. subtilis* group (over 99%) and less than 95%  
242 similarity with known *B. thuringiensis* and other species of *B. cereus* group, see Figure 2.

### 243 **3.3 Molecular phylogenetic analysis**

244 The evolutionary analysis of 21 native Turkish *Bacillus* strains, based on *16S rRNA* gene,  
245 was conducted with reference sequences of *Bacillus* species retrieved from NCBI  
246 GenBank databases. Neighbor-joining (NJ), maximum-likelihood (ML) analyses were  
247 performed with MEGA 7 (37). The topology of the ML and NJ trees was similar, and the  
248 bootstrap supports of the NJ tree were approximately higher than those of ML. The  
249 phylogenetic tree diverged into two lineages; one belongs to *B. subtilis* group while the  
250 other belongs to *B. cereus* group (Figure 4).

251 The lineage of *B. subtilis* group branched into two major clades (I and II). In clade I, six  
252 strains (*SY27.1A*, *SY35.3A*, *SY58.5A*, *SY80*, *SY81* and *SY85*) were clustered with *B.*  
253 *subtilis*, *B. amyloliquefaciens*, *B. velezensis* and *B. mojavensis*. However, *SY27.1A*, *SY35.3A*  
254 and *SY85* strains were closely related to *B. velezensis* strain CBMB205 and they shared  
255 nucleotide variations at TA1461-1462AT. While in clade II, four strains (*SY61.6*, *SY82*,

256 SY83 and SY84) were grouped with *B. pumilus* group which comprises *B. pumilus*, *B.*  
257 *safensis*, and *B. altitudinis*. In addition, all strains in clade II shared 11 nucleotide  
258 variations with *B. pumilus* group (T1017C, A1030G, G1032T, C1034T, G1045A, A1265T,  
259 A1270G, G1276A, A1282T, T1432C and A1485G), see Figure 3a. Four mutations (C971G,  
260 C1316T, C1330T and A1543C) in strain A made it a separate minor clade. Interestingly,  
261 three native strains (SY27.1A, SY35.3A and SY58.5A) that characterized by producing  
262 Cry proteins, which is often considered as a feature of *B. thuringiensis*, were clustered  
263 with *B. subtilis* group (Figure 2). The lineage of *B. cereus* group involved 11 strains. Three  
264 of them (SY49.1, SY10.1A, and SY25.1A) were characterized by producing Cry proteins.  
265 Moreover, seven strains shared a common ancestor and were characterized by two  
266 nucleotide variations (A1015C and A1146T). However, strain SY25.1A and *B.*  
267 *nitratireducens* strain MCCC 1A00732 were sisters with a bootstrap value of 63%, see  
268 Figure 4 for more illustration.

269

270

#### 271 **4. Discussion**

272 In this study, we observed three novel Gram- positive bacilli (SY27.1A, SY35.3A, and  
273 SY58.5A) which produce Cry proteins but, based on the analysis of *16S rRNA* gene, they  
274 are unlikely to belong to the known *B. thuringiensis* or other species of *Bacillus cereus*  
275 group. Although the defining feature of the *B. thuringiensis* species is the ability to  
276 express Cry proteins (20), the analysis of *16S rRNA* gene sequences of these strains  
277 showed that they were sharing over 97% similarity with *B. subtilis* group and less than

278 95% similarity with the known *B. thuringiensis* and other species of *B. cereus* group.  
279 However, in prokaryotes taxonomy, 16S rRNA gene sequence identity of 97 % is  
280 generally used as a threshold value for species definition, therefore, strains with less  
281 than 97.5% identity are unlikely to be related at the species level (43, 44). This finding is  
282 partially in agreement with a previous study that systematically searched for Cry  
283 proteins expressed by *Bacillus* species, other than *B. thuringiensis*, genomes using  
284 conserved sequences from the C-terminal half of reported Cry proteins in hidden  
285 Markov Model (HMM) profiles (45). Interestingly, there were 174 Cry protein sequences  
286 were observed, as expected most of them were in *B. thuringiensis* genomes, but 42 were  
287 found in other species. In addition, several studies reported the presence of Cry proteins  
288 in other Bacilli, such as *P. popilliae*, *C. bifermentans*, *L. sphaericus* and *P. lentimorbus* (46-49).  
289 Nevertheless, the great diversity of Cry proteins may indicate that this family of proteins  
290 may not be restricted only to the *B. thuringiensis* species (20), and their dispersion and  
291 role in nature are could be much wider. Therefore, further studies, either based on an in-  
292 silico procedure or the use of a large data collection of different species of bacilli, are  
293 recommended to search for new Cry proteins with higher toxicity or different mode of  
294 action, which may render alternatives in case of resistance development. However, the  
295 development of resistance to insecticidal *B. thuringiensis* proteins has been documented  
296 which raise concerns about the adequacy of current resistance management strategies  
297 (54). Hence, continuous searching for novel *Bacillus* species with novel insecticidal genes  
298 to delay the development of insect resistance is of the utmost importance. In this  
299 connection, to isolated novel *Bacillus* strains, we collected soil samples throughout  
300 Adana province. This region is rich in biodiversity due to its unique climate and  
301 geographical location that is situated on the fertile and watery delta of Seyhan and

302 Ceyhan rivers, furthermore in this study, the genetic identity based on *16S rRNA*  
303 sequences indicated that three native strains of *Bacillus* (SY27.1A, SY35.3A, and  
304 SY58.5A), which produce Cry proteins were close relatives of the *B. subtilis* group and  
305 appeared to be discrete from the *B. cereus* group. However, according to the low  
306 discrimination of the *16S rRNA* gene between *Bacillus* species, it cannot be assigned  
307 accurately as a certain species (55), therefore, complete genome sequencing of these  
308 bacterial strains is recommended. While, the other ten *Bacillus* strains, which clustered  
309 with *B. cereus* group, showed diversity into two minor clades. Seven of them shared a  
310 common ancestor and were characterized by two nucleotide variations (A1015C and  
311 A1146T). This finding is in agreement with other studies conducted in different  
312 countries which showed diversity in *B. cereus* / *B. thuringiensis* strains isolated from soil  
313 and other natural sources (24, 26, 56-58).

314 Furthermore, in the phylogenetic tree of the native strains with global reference  
315 sequences of *Bacillus* species, the lineage of *B. subtilis* group were branched into two  
316 major clades. Clade I contained *B. amyloliquefaciens*, *B. velezensis*, *B. mojavensis* along with  
317 *B. subtilis* which is not entirely unexpected since these species share a remarkably high  
318 level of *16S rRNA* gene sequence similarity to *B. subtilis* (often 99 % or greater) (16).  
319 While in clade II, the members of *B. pumilus* group (*B. pumilus*, *B. altitudinis*, and *B.*  
320 *safensis*) were clustered together along with four strains (SY61.6A, SY82, SY83, and  
321 SY84). They shared 11 nucleotide variations when their *16S rRNA* sequences compared  
322 with *B. subtilis* reference sequences, see Figure 3a. In 1973, Gordon *et al.* speculated that  
323 *B. pumilus* might one day be considered a variety of *B. subtilis* rather than a separate  
324 species once more data were collected (59). Intriguingly, our findings are in agreement

325 with Rooney *et al.* results which clearly indicated that the *B. pumilus* forms a clade  
326 distinct from *B. subtilis* (16).

327 However, single nucleotide polymorphism (SNP) analysis has emerged as one of the  
328 most useful molecular methods proposed for microbial characterization and improving  
329 discrimination among closely related species (60-62). Accordingly, we used universal  
330 primers of *16S rRNA* in order to produce a mixture of amplicons from all *rRNA* operons  
331 in the genome. Although there are small differences exhibit by the multiple *rRNA* gene  
332 copies in each genome, these differences do not invalidate bacterial identification and  
333 characterization based on *16S rRNA* sequences (63, 64). Moreover, these differences  
334 between *rRNA* operons appear in multiple peaks (two or more) at a single nucleotide  
335 position in the case of SNPs. But in the case of InDels variations, the sequence loses  
336 synchronicity and makes an abrupt change, from clean to dirty, following an InDel  
337 mutation (65), for more illustration see Figure3b. In the present study, we provided a  
338 detailed analysis of the SNPs present in the *16S rRNA* gene of *Bacillus* species isolated  
339 from soil samples. Of great significance, dual peaks (A and T) at position 1146, which  
340 were previously reported to be specific to *B. anthracis* (66), were detected in three *B.*  
341 *thuringiensis* / *B. cereus* strains (*PSY6.1A*, *PSY6.2A* and *SY10.1A*). But in all other strains, a  
342 single peak (either A or T) was detected. This finding is in accordance with a study  
343 conducted by Hakovirta *et al.* which found five *B. cereus* strains and three *B. thuringiensis*  
344 strains also had A and T peaks (65). Hence, the SNP at nucleotide position 1146 is not  
345 necessarily reliable for identifying *B. anthracis*. While, in this study, all *B. thuringiensis*  
346 had only G at position 1139 which is another SNP proposed by Hakovirta *et al.* to be  
347 unique to *B. anthracis* (65), and it appears to be more reliable for identifying *B. anthracis*.



348 Regarding the *B. subtilis* group, we identified 11 canonical SNPs (canSNPs) in strains  
349 that belong to *B. pumilus* groups (clade II) when compared with *B. subtilis* reference  
350 sequences. Canonical SNPs (canSNPs) are useful and diagnostic SNPs that used for  
351 identifying long branches or key phylogenetic positions (67). In addition, G1268A and  
352 C1294T SNPs were specific to *B. safensis* and *B. altitude*, respectively. Also, strain SY83  
353 characterized by four nucleotide variations SNPs (C971G, C1316T, C1330T and A1543C).  
354 These findings are partially in agreement with a study conducted by Moorhead *et al.* in  
355 which strains of *Listeria monocytogenes* were partitioned into three previously described  
356 clonal lineages using a phylogenetic approach to detect a small number of SNPs in the  
357 *sigB* gene (68). However, a number of researchers have found that a small number of  
358 SNPs can be used to effectively identify genetic groups (61, 67, 69). Also, Keim *et al.*  
359 proposed canSNPs to define the *B. anthracis* lineage that contains the Ames strain  
360 (67). The limitations of the present study include the relatively small sample size and the  
361 phylogenetic tree was built based on the *16S rRNA* gene only. Hence, further studies  
362 with large sample size and molecular techniques, such as multilocus sequence analysis  
363 (MLST) and whole genome sequencing (WGS), that are used to differentiate the closely  
364 related microbial species like *Bacillus* species are recommended. However, in this work,  
365 the SNPs analysis provided more intra-specific information than phylogenetic analysis  
366 in the cases of *B. subtilis* group. Eleven canSNPs were identified in strains that belong to  
367 *B. pumilus* groups when compared with *B. subtilis* reference sequences. In addition, these  
368 canSNPs in the conserved region of *16S rRNA* gene may provide important information  
369 for the design of primers and probes for Real-Time PCR, multiplex-PCR and microarray  
370 systems which is widely used for detection and typing purposes.

371 In conclusion, the phylogenetic tree diverged into two lineages; one belongs to *B.*  
372 *subtilis* group while the other belongs to *B. cereus* group. Interestingly, three of  
373 native strains (*SY27.1A*, *SY35.3A*, and *SY58.5A*), which produce Cry proteins,  
374 shared high similarity with *B. subtilis* group (over 99%). An 11 canSNPs were  
375 identified in strains that belong to *B. pumilus* groups when compared with *B.*  
376 *subtilis* reference sequences. These canSNPs in the conserved region of *16S rRNA*  
377 gene may provide important information for the design of primers and probes  
378 which is widely used for detection and typing purposes.

### 379 **Supplementary file**

380 Table S1. Information of the reference sequences of *Bacillus* species that were  
381 retrieved from NCBI databases.

### 382 **Acknowledgment**

383 We gratefully acknowledge the Genome and stem cell (GenKök) research center  
384 for their cooperation and supporting the study experiments.

385

### 386 **Authors' contributions**

387 **Semih Yılmaz:** Conceptualization, funding acquisition, methodology, writing -  
388 review & editing, and supervision; **Abeer Babiker Idris:** conceptualization,  
389 methodology, investigation, software, data curation and formal analysis, writing

390 - original draft; and writing - review & editing; **Abdurrahman Ayvaz**: funding  
391 acquisition, methodology and supervision; **Aysun Çetin**: methodology; **Funda**  
392 **Ülgen**: methodology and writing - original draft; **Mustafa Çetin**: funding  
393 acquisition, and supervision; **Berkay Saraymen**: methodology and data curation  
394 and formal analysis; **Mohamed A. Hassan**: conceptualization, methodology,  
395 writing - review & editing, and supervision.

#### 396 **Availability of data**

397 All data generated or analyzed during this study are included in the manuscript.

#### 398 **Competing of interests**

399 The authors have no competing of interests to declare.

#### 400 **Ethical Approval**

401 This study was approved by Erciyes University, Faculty of Agriculture,  
402 Department of Agricultural Biotechnology.

#### 403 **Funding**

404 This work was supported by Erciyes University Scientific Project Unit under the  
405 codes of FBD11-3634; and Ministry of Industrial Science and Technology, Turkey  
406 (TGSD-0802).

#### 407 **Consent of participants**

408 Not applicable

409

410

411

412

413

414

415 **References**

- 416 1. Huang T-P, Tzeng DD-S, Wong ACL, Chen C-H, Lu K-M, Lee Y-H, et al.  
417 DNA polymorphisms and biocontrol of *Bacillus* antagonistic to citrus bacterial  
418 canker with indication of the interference of phyllosphere biofilms. *PLoS One*.  
419 2012;7(7):e42124-e.
- 420 2. Liu Y, Lai Q, Dong C, Sun F, Wang L, Li G, et al. Phylogenetic diversity of  
421 the *Bacillus pumilus* group and the marine ecotype revealed by multilocus  
422 sequence analysis. *PLoS One*. 2013;8(11):e80097-e.
- 423 3. Radhakrishnan R, Hashem A, Abd Allah EF. *Bacillus*: A Biological Tool  
424 for Crop Improvement through Bio-Molecular Changes in Adverse  
425 Environments. *Front Physiol*. 2017;8:667-.

- 426 4. Garbeva P, van Veen JA, van Elsas JD. Predominant *Bacillus* spp. in  
427 Agricultural Soil under Different Management Regimes Detected via PCR-  
428 DGGE. *Microbial Ecology*. 2003;45(3):302-16.
- 429 5. Fu X, Gong L, Liu Y, Lai Q, Li G, Shao Z. *Bacillus pumilus* Group  
430 Comparative Genomics: Toward Pangenome Features, Diversity, and Marine  
431 Environmental Adaptation. *Frontiers in microbiology*. 2021;12(1084).
- 432 6. Parte AC, Sardà Carbasse J, Meier-Kolthoff JP, Reimer LC, Göker M. List  
433 of Prokaryotic names with Standing in Nomenclature (LPSN) moves to the  
434 DSMZ. *International journal of systematic and evolutionary microbiology*.  
435 2020;70(11):5607-12.
- 436 7. Woese CR, Kandler O, Wheelis ML. Towards a natural system of  
437 organisms: proposal for the domains Archaea, Bacteria, and Eucarya.  
438 *Proceedings of the National Academy of Sciences of the United States of*  
439 *America*. 1990;87(12):4576-9.
- 440 8. Van de Peer Y, Jansen J, De Rijk P, De Wachter R. Database on the  
441 structure of small ribosomal subunit RNA. *Nucleic Acids Research*.  
442 1997;25(1):111-6.
- 443 9. Maidak BL, Olsen GJ, Larsen N, Overbeek R, McCaughey MJ, Woese CR.  
444 The Ribosomal Database Project (RDP). *Nucleic Acids Research*. 1996;24(1):82-5.
- 445 10. Drancourt M, Bollet C, Carlioz A, Martelin R, Gayral JP, Raoult D. 16S  
446 ribosomal DNA sequence analysis of a large collection of environmental and

- 447 clinical unidentifiable bacterial isolates. *Journal of clinical microbiology*.  
448 2000;38(10):3623-30.
- 449 11. Woese CR. Bacterial evolution. *Microbiol Rev*. 1987;51(2):221-71.
- 450 12. Janda JM, Abbott SL. 16S rRNA gene sequencing for bacterial  
451 identification in the diagnostic laboratory: pluses, perils, and pitfalls. *Journal of*  
452 *Clinical Microbiology*. 2007;45(9):2761-4.
- 453 13. Patel JB. 16S rRNA gene sequencing for bacterial pathogen identification  
454 in the clinical laboratory. *Molecular diagnosis*. 2001;6(4):313-21.
- 455 14. Idris AB, Hassan HG, Ali MAS, Eltaher SM, Idris LB, Altayb HN, et al.  
456 Molecular Phylogenetic Analysis of 16S rRNA Sequences Identified Two  
457 Lineages of *Helicobacter pylori* Strains Detected from Different Regions in Sudan  
458 Suggestive of Differential Evolution. *International Journal of Microbiology*.  
459 2020;2020:8825718.
- 460 15. Fan B, Blom J, Klenk H-P, Borriss R. *Bacillus amyloliquefaciens*, *Bacillus*  
461 *velezensis*, and *Bacillus siamensis* Form an “Operational Group *B.*  
462 *amyloliquefaciens*” within the *B. subtilis* Species Complex. *Frontiers in*  
463 *microbiology*. 2017;8.
- 464 16. Rooney AP, Price NP, Ehrhardt C, Swezey JL, Bannan JD. Phylogeny and  
465 molecular taxonomy of the *Bacillus subtilis* species complex and description of  
466 *Bacillus subtilis* subsp. *inaquosorum* subsp. nov. *International journal of*  
467 *systematic and evolutionary microbiology*. 2009;59(Pt 10):2429-36.

- 468 17. Logan NA. Modern Methods for Identification. Applications and  
469 Systematics of Bacillus and Relatives 2002. p. 123-40.
- 470 18. Guinebretière MH, Auger S, Galleron N, Contzen M, De Sarrau B, De  
471 Buyser ML, et al. *Bacillus cytotoxicus* sp. nov. is a novel thermotolerant species  
472 of the *Bacillus cereus* Group occasionally associated with food poisoning.  
473 International journal of systematic and evolutionary microbiology. 2013;63(Pt  
474 1):31-40.
- 475 19. Punina NV, Zotov VS, Parkhomenko AL, Parkhomenko TU, Topunov AF.  
476 Genetic Diversity of *Bacillus thuringiensis* from Different Geo-Ecological Regions  
477 of Ukraine by Analyzing the 16S rRNA and *gyrB* Genes and by AP-PCR and  
478 saAFLP. Acta naturae. 2013;5(1):90-100.
- 479 20. Tetreau G, Andreeva EA, Banneville AS, De Zitter E, Colletier JP. How  
480 Does *Bacillus thuringiensis* Crystallize Such a Large Diversity of Toxins? Toxins.  
481 2021;13(7).
- 482 21. Garbeva P, van Veen JA, van Elsas JD. Predominant *Bacillus* spp. in  
483 agricultural soil under different management regimes detected via PCR-DGGE.  
484 Microbial ecology. 2003;45(3):302-16.
- 485 22. Wilson MK, Abergel RJ, Raymond KN, Arceneaux JE, Byers BR.  
486 Siderophores of *Bacillus anthracis*, *Bacillus cereus*, and *Bacillus thuringiensis*.  
487 Biochemical and biophysical research communications. 2006;348(1):320-5.

- 488 23. Raddadi N, Cherif A, Boudabous A, Daffonchio D. Screening of plant  
489 growth promoting traits of *Bacillus thuringiensis*. *Annals of Microbiology*.  
490 2008;58:47-52.
- 491 24. Rabha M, Sharma S, Acharjee S, Sarmah BK. Isolation and characterization  
492 of *Bacillus thuringiensis* strains native to Assam soil of North East India. *3*  
493 *Biotech*. 2017;7(5):303.
- 494 25. Sauka DH, Benintende GB. Diversity and distribution of lepidopteran-  
495 specific toxin genes in *Bacillus thuringiensis* strains from Argentina. *Revista*  
496 *Argentina de microbiologia*. 2017;49(3):273-81.
- 497 26. Nair K, Al-Thani R, Al-Thani D, Al-Yafei F, Ahmed T, Jaoua S. Diversity  
498 of *Bacillus thuringiensis* Strains From Qatar as Shown by Crystal Morphology,  
499 delta-Endotoxins and Cry Gene Content. *Frontiers in microbiology*. 2018;9:708.
- 500 27. Travers RS, Martin PA, Reichelderfer CF. Selective Process for Efficient  
501 Isolation of Soil *Bacillus* spp. *Applied and environmental microbiology*.  
502 1987;53(6):1263-6.
- 503 28. Baig DN, Mehnaz S. Determination and distribution of cry-type genes in  
504 halophilic *Bacillus thuringiensis* isolates of Arabian Sea sedimentary rocks.  
505 *Microbiological research*. 2010;165(5):376-83.
- 506 29. Centralblatt für Bakteriologie, Parasitenkunde und  
507 Infektionskrankheiten. 1. Abt. Originale. Jena :: G. Fischer; 1902.



- 508 30. Yılmaz S, Ayvaz A, Azizoğlu U. Diversity and distribution of cry genes in  
509 native *Bacillus thuringiensis* strains isolated from wild ecological areas of East-  
510 Mediterranean region of Turkey. *Tropical Ecology*. 2017;58:605-10.
- 511 31. YILMAZ S. Molecular characterization of *Bacillus thuringiensis* strains  
512 isolated from various habitats and their use against some harmful insects. Erciyes  
513 University Research Information System: Erciyes University; 2010.
- 514 32. Cerón J, Ortíz A, Quintero R, Güereca L, Bravo A. Specific PCR primers  
515 directed to identify cryI and cryIII genes within a *Bacillus thuringiensis* strain  
516 collection. *Applied and environmental microbiology*. 1995;61(11):3826-31.
- 517 33. Bravo A, Sarabia S, Lopez L, Ontiveros H, Abarca C, Ortiz A, et al.  
518 Characterization of cry genes in a Mexican *Bacillus thuringiensis* strain  
519 collection. *Applied and environmental microbiology*. 1998;64(12):4965-72.
- 520 34. FinchTV. 1.4.0 ed. USA: Geospiza, Inc.; Seattle, WA,; 2012.
- 521 35. Altschul SF, Madden TL, Schäffer AA, J Zhang ZZ, Miller W, Lipman DJ.  
522 Gapped BLAST and PSI-BLAST. A new generation of protein database search  
523 programmes. *Nucleic Acids Res*. 1997;25(17):3389–402.
- 524 36. Hall TA. BioEdit: a user-friendly biological sequence alignment editor  
525 and analysis program for Windows 95/98/NT. *Nucl Acids Symp Ser*  
526 1999;41:95-8.
- 527 37. Kumar S, Stecher G, Tamura K. MEGA7: Molecular Evolutionary Genetics  
528 Analysis Version 7.0 for Bigger Datasets. *Molecular biology and evolution*.  
529 2016;33(7):1870-4.

- 530 38. Castresana J. Selection of Conserved Blocks from Multiple Alignments for  
531 Their Use in Phylogenetic Analysis. *Molecular Biology and Evolution*.  
532 2000;17(4):540-52.
- 533 39. Saitou N, Nei M. The neighbor-joining method: a new method for  
534 reconstructing phylogenetic trees. *Molecular biology and evolution*.  
535 1987;4(4):406-25.
- 536 40. Goldman N. Maximum Likelihood Inference of Phylogenetic Trees, with  
537 Special Reference to a Poisson Process Model of DNA Substitution and to  
538 Parsimony Analyses. *Systematic Biology*. 1990;39(4):345-61.
- 539 41. Nei M, Kumar S. *Molecular Evolution and Phylogenetics*. USA: Oxford  
540 University Press; 2000.
- 541 42. Felsenstein J. CONFIDENCE LIMITS ON PHYLOGENIES: AN  
542 APPROACH USING THE BOOTSTRAP. *Evolution; international journal of*  
543 *organic evolution*. 1985;39(4):783-91.
- 544 43. Patel JB. 16S rRNA gene sequencing for bacterial pathogen identification  
545 in the clinical laboratory. *Molecular diagnosis : a journal devoted to the*  
546 *understanding of human disease through the clinical application of molecular*  
547 *biology*. 2001;6(4):313-21.
- 548 44. Stackebrandt E, Goebel BM. Taxonomic Note: a Place for DNA-DNA  
549 Reassociation and 16s rRNA Sequence Analysis in the Present Species Definition  
550 in *Bacteriology*1994.

- 551 45. Castillo-Esparza JF, Hernández-González I, Ibarra JE. Search for Cry  
552 proteins expressed by *Bacillus* spp. genomes, using hidden Markov model  
553 profiles. *3 Biotech*. 2019;9(1):13-.
- 554 46. Barloy F, Lecadet MM, Delécluse A. Cloning and sequencing of three new  
555 putative toxin genes from *Clostridium bifermentans* CH18. *Gene*.  
556 1998;211(2):293-9.
- 557 47. Zhang J, Hodgman TC, Krieger L, Schnetter W, Schairer HU. Cloning and  
558 analysis of the first cry gene from *Bacillus popilliae*. *Journal of bacteriology*.  
559 1997;179(13):4336-41.
- 560 48. Yokoyama T, Tanaka M, Hasegawa M. Novel cry gene from *Paenibacillus*  
561 *lentimorbus* strain Semadara inhibits ingestion and promotes insecticidal activity  
562 in *Anomala cuprea* larvae. *Journal of invertebrate pathology*. 2004;85(1):25-32.
- 563 49. Jones GW, Nielsen-Leroux C, Yang Y, Yuan Z, Dumas VF, Monnerat RG,  
564 et al. A new Cry toxin with a unique two-component dependency from *Bacillus*  
565 *sphaericus*. *FASEB journal : official publication of the Federation of American*  
566 *Societies for Experimental Biology*. 2007;21(14):4112-20.
- 567 50. Ben-Dov E, Zaritsky A, Dahan E, Barak Z, Sinai R, Manasherob R, et al.  
568 Extended screening by PCR for seven cry-group genes from field-collected  
569 strains of *Bacillus thuringiensis*. *Applied and environmental microbiology*.  
570 1997;63(12):4883-90.
- 571 51. Feitelson JS, Payne J, Kim L. *Bacillus thuringiensis*: Insects and Beyond.  
572 *Bio/Technology*. 1992;10(3):271-5.

- 573 52. Shishir A, Roy A, Islam N, Rahman A, Khan SN, Hoq MM. Abundance  
574 and diversity of *Bacillus thuringiensis* in Bangladesh and their cry genes profile.  
575 *Frontiers in Environmental Science*. 2014;2(20).
- 576 53. Rabha M, Acharjee S, Sarmah BK. Multilocus sequence typing for  
577 phylogenetic view and vip gene diversity of *Bacillus thuringiensis* strains of the  
578 Assam soil of North East India. *World journal of microbiology & biotechnology*.  
579 2018;34(7):103.
- 580 54. Gassmann AJ, Shrestha RB, Kropf AL, St Clair CR, Brenizer BD. Field-  
581 evolved resistance by western corn rootworm to Cry34/35Ab1 and other *Bacillus*  
582 *thuringiensis* traits in transgenic maize. *Pest management science*. 2020;76(1):268-  
583 76.
- 584 55. Liu Y, Du J, Lai Q, Zeng R, Ye D, Xu J, et al. Proposal of nine novel species  
585 of the *Bacillus cereus* group. *International journal of systematic and evolutionary*  
586 *microbiology*. 2017;67(8):2499-508.
- 587 56. Zothansanga R, Senthilkumar N, Gurusubramanian G. Diversity and  
588 Toxicity of *Bacillus thuringiensis* from Shifting Cultivation (Jhum) Habitat.  
589 *Biocontrol science*. 2016;21(2):99-111.
- 590 57. Helgason E, Caugant DA, Lecadet MM, Chen Y, Mahillon J, Lovgren A, et  
591 al. Genetic diversity of *Bacillus cereus*/*B. thuringiensis* isolates from natural  
592 sources. *Current microbiology*. 1998;37(2):80-7.
- 593 58. Gdoura-Ben Amor M, Siala M, Zayani M, Grosset N, Smaoui S, Messadi-  
594 Akrouf F, et al. Isolation, Identification, Prevalence, and Genetic Diversity of

- 595 Bacillus cereus Group Bacteria From Different Foodstuffs in Tunisia. *Frontiers in*  
596 *microbiology*. 2018;9(447).
- 597 59. Gordon REHWCPCH-NSNR. The genus Bacillus. Washington, D.C.:  
598 Agricultural Research Service, U.S. Dept. of Agriculture : For sale by Supt. of  
599 Docs., U.S. G.P.O.; 1973. Available from:  
600 <http://books.google.com/books?id=IXMpXssWFD0C>.
- 601 60. Kwok P-Y. Single Nucleotide Polymorphisms (SNPs): Identification and  
602 Scoring. eLS.
- 603 61. Dimauro C, Cellesi M, Steri R, Gaspa G, Sorbolini S, Stella A, et al. Use of  
604 the canonical discriminant analysis to select SNP markers for bovine breed  
605 assignment and traceability purposes. *Animal Genetics*. 2013;44(4):377-82.
- 606 62. Griffing SM, MacCannell DR, Schmidtke AJ, Freeman MM, Hyytiä-Trees  
607 E, Gerner-Smidt P, et al. Canonical Single Nucleotide Polymorphisms (SNPs) for  
608 High-Resolution Subtyping of Shiga-Toxin Producing Escherichia coli (STEC)  
609 O157:H7. *PLoS One*. 2015;10(7):e0131967.
- 610 63. Fernandez-No IC, Bohme K, Caamano-Antelo S, Barros-Velazquez J, Calo-  
611 Mata P. Identification of single nucleotide polymorphisms (SNPs) in the 16S  
612 rRNA gene of foodborne Bacillus spp. *Food microbiology*. 2015;46:239-45.
- 613 64. Pillidge CJ, Sheehy LM, Shihata A, Pu Z-Y, Dobos M, Powell IB.  
614 Intragenomic 16S rRNA gene heterogeneity in Lactococcus lactis subsp. cremoris.  
615 *International Dairy Journal*. 2009;19(4):222-7.

- 616 65. Hakovirta JR, Prezioso S, Hodge D, Pillai SP, Weigel LM. Identification  
617 and Analysis of Informative Single Nucleotide Polymorphisms in 16S rRNA  
618 Gene Sequences of the Bacillus cereus Group. *Journal of clinical microbiology*.  
619 2016;54(11):2749-56.
- 620 66. Sacchi CT, Whitney AM, Mayer LW, Morey R, Steigerwalt A, Boras A, et  
621 al. Sequencing of 16S rRNA gene: a rapid tool for identification of Bacillus  
622 anthracis. *Emerging infectious diseases*. 2002;8(10):1117-23.
- 623 67. Keim P, Van Ert MN, Pearson T, Vogler AJ, Huynh LY, Wagner DM.  
624 Anthrax molecular epidemiology and forensics: using the appropriate marker for  
625 different evolutionary scales. *Infection, genetics and evolution : journal of*  
626 *molecular epidemiology and evolutionary genetics in infectious diseases*.  
627 2004;4(3):205-13.
- 628 68. Moorhead SM, Dykes GA, Cursons RT. An SNP-based PCR assay to  
629 differentiate between *Listeria monocytogenes* lineages derived from  
630 phylogenetic analysis of the sigB gene. *Journal of microbiological methods*.  
631 2003;55(2):425-32.
- 632 69. Van Ert MN, Easterday WR, Simonson TS, U'Ren JM, Pearson T, Kenefic  
633 LJ, et al. Strain-specific single-nucleotide polymorphism assays for the Bacillus  
634 anthracis Ames strain. *Journal of clinical microbiology*. 2007;45(1):47-53.

635

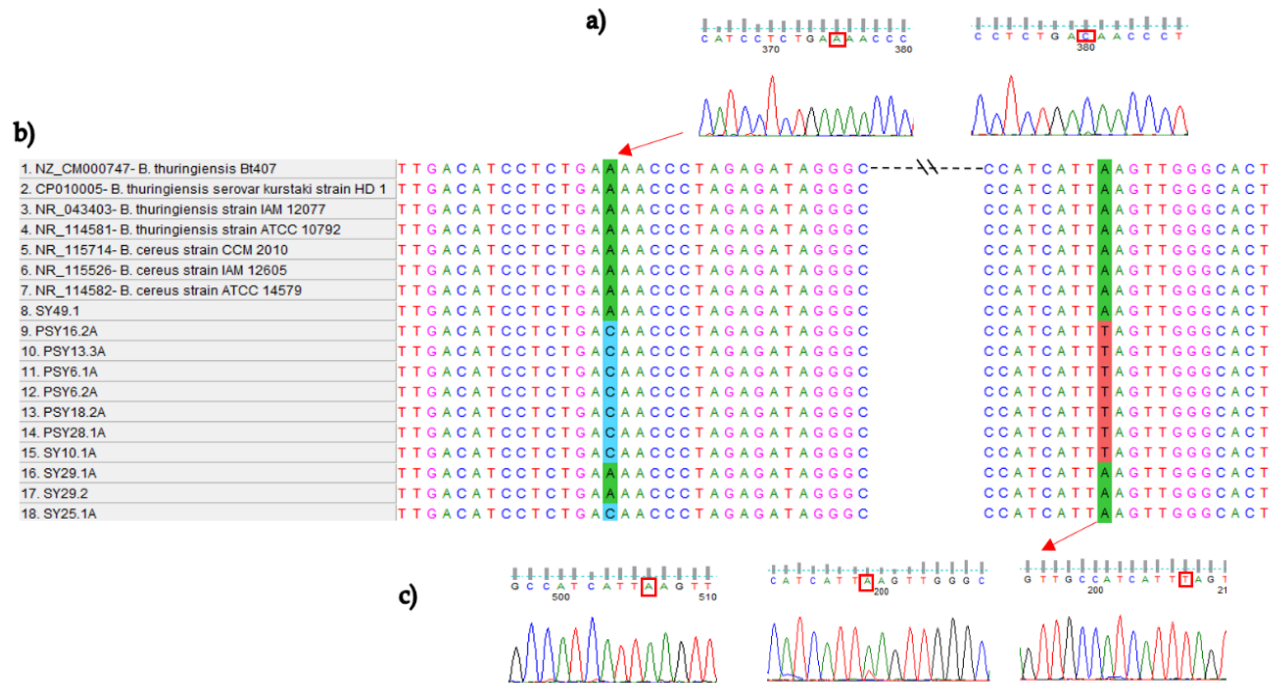

Figure 1. 1a) and 1b) Sequencing results of chromatograms using Finch TV software show nucleotide changes in the *16S rRNA* gene of *B. cereus* / *B. thuringiensis* strains illustrated by squares. 1c) Multiple sequences alignment of the native *Bacillus* strains that belong to *B. cereus* group using ClustalW.

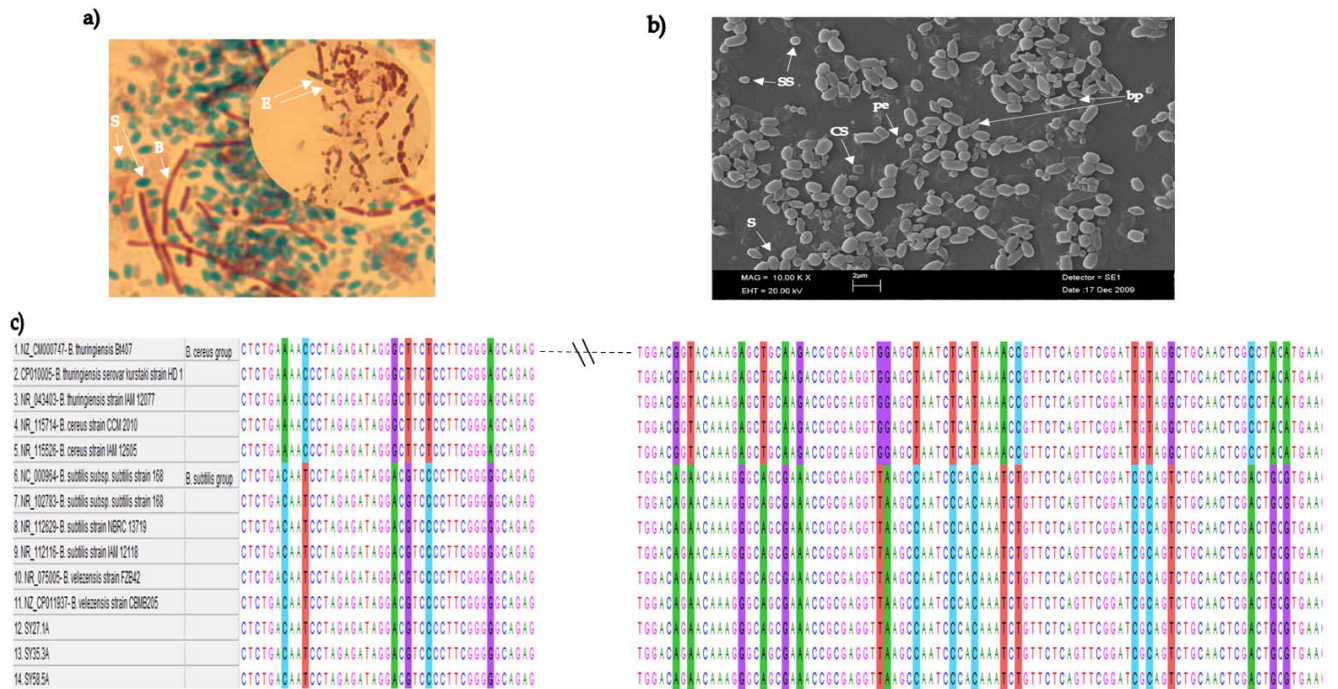

**Figure 2.** 2a) Microscopic view of native *Bacillus* strains after spore staining (1000x). B, *Bacillus* bacteria; S, spores; E, endospores. 2b) Scanning electron microscopy (SEM) image of the different types of crystal morphologies and the spores (S) produced by native *Bacillus* strain SY27.1A isolated from soil sample. SS, smooth spherical crystal; pe, spherical crystal with pointy edges; bp, bipyramidal crystal; cs, cuboidal crystal. 2c) Multiple Sequence Alignment (MSA) of 16S rRNA sequences of the three native strains (SY27.1A, SY35.3A, SY58.5A) shows high similarity with *B. subtilis* group rather than species of *B. cereus* group.



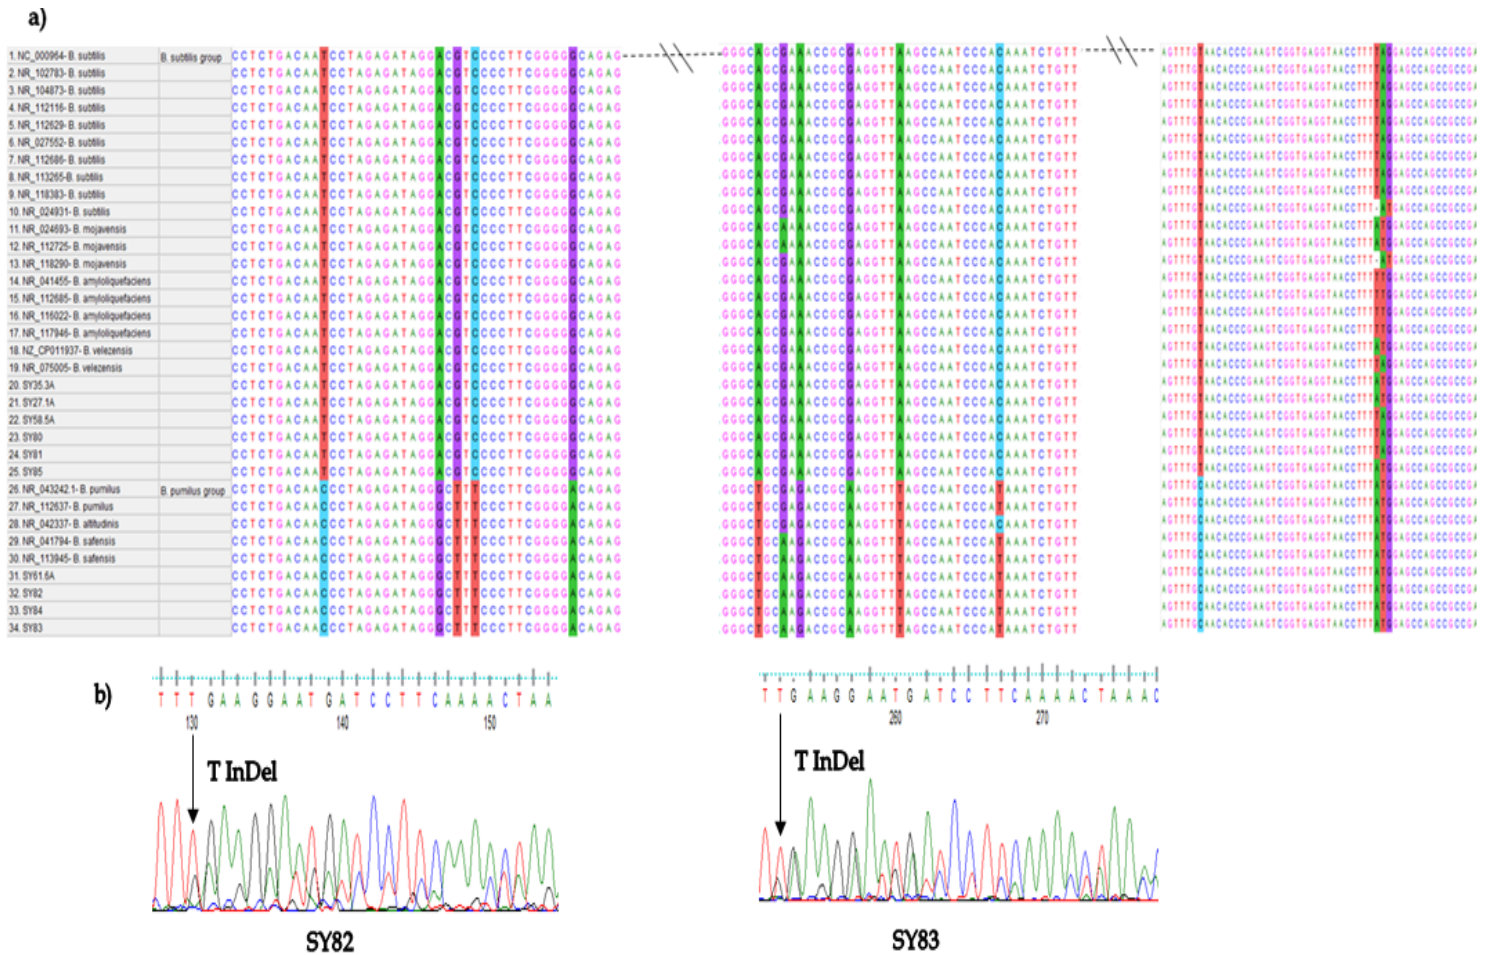

Figure 3. 3a) Multiple sequences alignment (MSA) of *B. subtilis* group shows 11 canonical SNPs (canSNPs) in strains that belong to *B. pumilus* groups when compared with *B. subtilis* reference sequences. 3b) Sequencing results of chromatograms illustrate the loss of synchronicity in SY82 and SY83 strains due to a nucleotide deletion or insertion within one or more of the *16S rRNA* genes among the multiple *rRNA* operons in the genome.

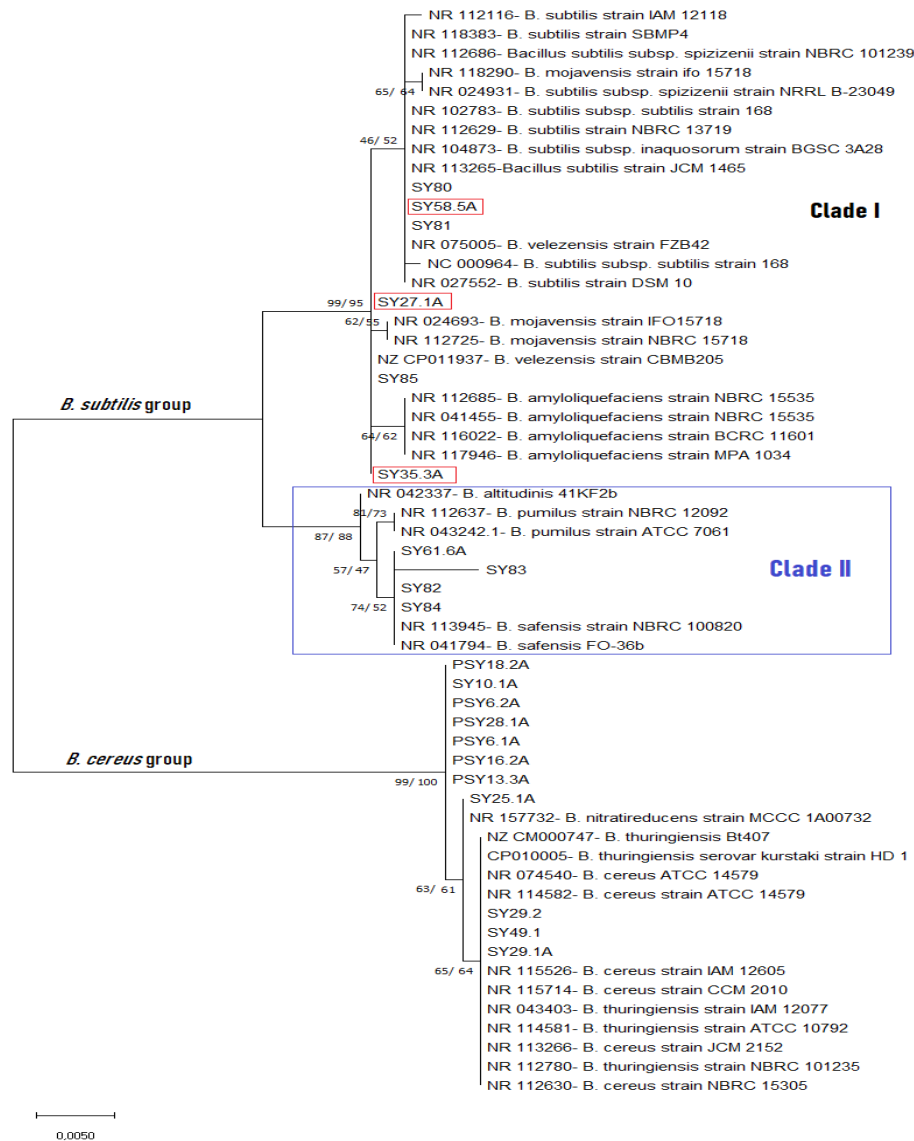

**Figure 4.** Maximum-Likelihood Phylogenetic tree of native *Bacillus* strains isolated from Turkey. The percentage of replicate trees (1000 replicates) are shown next to the branches from both NJ (before the slash '/') and ML (after the slash '/') analyses. The ML tree is only shown here, because the ML tree was very similar to the NJ tree. The evolutionary distance was computed using (K2+G) model and evolutionary analyses were conducted using MEGA7.



## Highlights

- Isolation and characterization of native *Bacillus* strains from agricultural soil should receive a good attention because of their wide potential biological products with immense applications.
- Identification of three native strains (SY27.1A, SY35.3A, and SY58.5A), which produce Cry proteins, shared high similarity with *B. subtilis* group (over 99%) and less than 95% similarity with known *B. thuringiensis* and other species of *B. cereus* group.
- Eleven canonical SNPs (canSNPs) were detected in strains that belong to *B. pumilus* group when compared with *B. subtilis* reference sequences.
- The SNP at nucleotide position 1146 is not necessarily reliable for identifying *B. anthracis*, while G at position 1139, which is another SNP proposed to be unique to *B. anthracis*, appears to be more reliable for identifying *B. anthracis*.
- Phylogenetic analysis of *16S rRNA* sequences was found valuable for differentiation between *Bacillus* species isolated from soil samples.
